# Supplementary material for: Polyamine Homeostasis in Snyder-Robinson Syndrome
Source: PubMed Central journal article supplement (PMC6318755; doi:10.3390/medsci6040112), 2018-12-07
Supplement: medsci-06-00112-s001.pdf [file medsci-06-00112-s001.pdf]

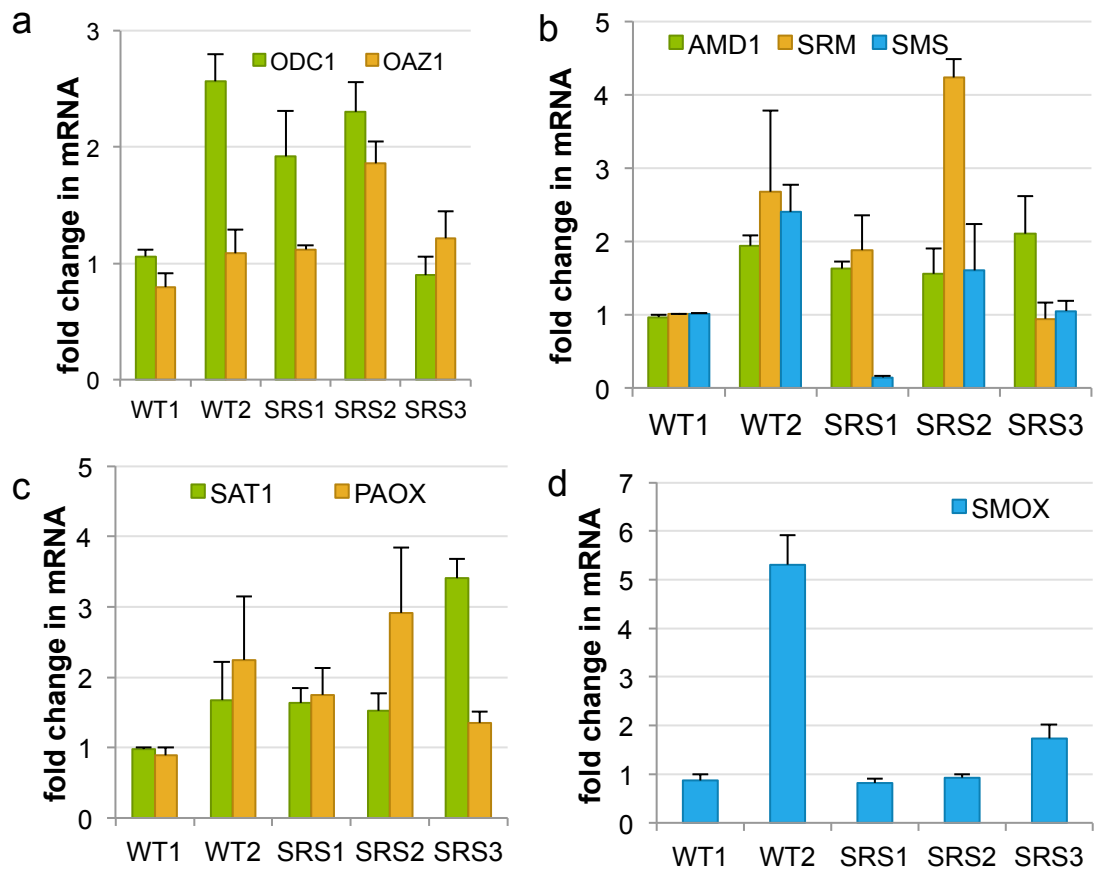

Figure S1. Quantitative RT-PCR results for (a) *ODC1* and *OAZ1*, (b) *AMD1*, *SRM*, and *SMS*, (c) *SAT1* and *PAOX*, and (d) *SMOX* mRNA expression, normalized to *GAPDH* (n = 3; error bars = SEM).
